1 **A bacterial artificial chromosome (BAC)-vectored noninfectious replicon of**  
2 **SARS-CoV-2**

3  
4 Yang Zhang<sup>1</sup>, Wuhui Song<sup>1</sup>, Shuiye Chen<sup>1</sup>, Zhenghong Yuan<sup>1\*</sup>, Zhigang Yi<sup>1,2\*</sup>

5  
6 1. Key Laboratory of Medical Molecular Virology (MOE/NHC/CAMS), School of Basic  
7 Medical Sciences, Shanghai Medical College, Fudan University, Shanghai, 200032, PR  
8 China

9 2. Shanghai public health clinical center, Fudan University, Shanghai, 201508, PR China

10 Runing title: *A replicon of SARS-CoV-2*

11  
12  
13 \* Contact authors: Zhigang Yi, Shanghai Medical College, Fudan University, Shanghai  
14 200032, China, Email: [zgyi@fudan.edu.cn](mailto:zgyi@fudan.edu.cn). 138 YiXueYuan Road, Shanghai 200032, China.

15 Zhenghong Yuan, Shanghai Medical College, Fudan University, Shanghai 200032, China  
16 Email: [zh yuan@shmu.edu](mailto:zh yuan@shmu.edu). 138 YiXueYuan Road, Shanghai 200032, China. Tel:  
17 +86-21-54237669. Fax: +86-21-64227201

18

19

20

21

## 22 **Abstract**

23        Vaccines and antiviral agents are in urgent need to stop the COVID-19 pandemic. To  
24        facilitate antiviral screening against SARS-CoV-2 without requirement for high biosafety  
25        level facility, we developed a bacterial artificial chromosome (BAC)-vectored replicon of  
26        SARS-CoV-2, nCoV-SH01 strain, in which secreted *Gaussia* luciferase (sGluc) was encoded  
27        in viral subgenomic mRNA as a reporter gene. The replicon was devoid of structural genes  
28        spike (S), membrane (M), and envelope (E). Upon transfection, the replicon RNA replicated  
29        in various cell lines, and was sensitive to interferon alpha (IFN- $\alpha$ ), remdesivir, but was  
30        resistant to hepatitis C virus inhibitors daclatasvir and sofosbuvir. Replication of the replicon  
31        was also sensitive overexpression of zinc-finger antiviral protein (ZAP). We also constructed  
32        a four-plasmid *in-vitro* ligation system that is compatible with the BAC system, which makes  
33        it easy to introduce desired mutations into the assembly plasmids for *in-vitro* ligation. This  
34        replicon system would be helpful for performing antiviral screening and dissecting virus-host  
35        interactions.

36

37

38

39

## 40 **Introduction**

41       The pandemic COVID-19 has infected over 26 million people and caused over 800,000  
42 mortalities. (<https://www.who.int/emergencies/diseases/novel-coronavirus-2019>). It is caused  
43 by infection with a novel *beta* coronavirus SARS-CoV-2<sup>1-3</sup>. Vaccines and antiviral agents  
44 are in urgent need to stop the pandemic. Despite great progresses on SARS-CoV-2 vaccine  
45 development and clinical trials<sup>4</sup>, the protection efficacy of the vaccines still remains to be  
46 determined. There have been trials of antiviral agents such as remdesivir and chloroquine for  
47 COVID-19 treatment, however, efficacy of these antiviral agents remains uncertainty<sup>5-7</sup>.  
48 Development of convenient tools for antiviral screening will speed up seeking effective  
49 antiviral agents against SARS-CoV-2. Recently, infectious clones of SARS-CoV-2 with  
50 reporter genes<sup>8,9</sup> provide elegant tools for antiviral development. However, due to the safety  
51 issue and requirement for biosafety level 3 laboratory, usage of these infectious clones is  
52 limited. Non-infectious replicon system that recapitulates authentic viral replication without  
53 virion production can be used to perform screening for antivirals that target viral replication  
54 process.

55       SARS-CoV-2 contains an approximate 29kb, single stranded, positive sense RNA  
56 genome. About two-thirds of the viral genome encodes open reading frames (ORFs) for  
57 translation of the replicase and transcriptase proteins, the only ORFs translated from the viral  
58 genome. The translated replicase and transcriptase proteins engage viral genome to assemble  
59 the replicase-transcriptase complex on endoplasmic reticulum membrane, forming a  
60 membranous compartment. Within the membranous compartment, replicase-transcriptase

61 complex initiates viral replication and transcription. Transcription of the 3'-most third  
62 genomes by viral replicase-transcriptase generates various subgenomic mRNAs that encode  
63 structural proteins and accessory genes<sup>10</sup>. Structural proteins include the spike (S),  
64 membrane (M), envelop (E) proteins and nucleocapsid (N) participate in virion assembly<sup>10</sup>.  
65 In this study, we generated a replicon system for SARS-CoV-2, nCoV-SH01 strain with  
66 secreted *Gaussia* luciferase (sGluc) as a reporter gene. The cDNA of viral genome with  
67 deletion of S, M, E genes was cloned into a bacterial artificial chromosome (BAC) vector.  
68 The reporter gene sGluc was encoded in subgenomic viral RNA. The viral RNA was  
69 transcribed *in vitro* by T7 polymerase. Upon transfection into cells, the viral replication was  
70 detected, as evidenced by expression of subgenomic viral RNA-encoded sGluc. The viral  
71 replication was sensitive to interferon alpha (IFN- $\alpha$ ), remdesivir, but was resistant to hepatitis  
72 C virus inhibitors daclatasvir and sofosbuvir. The replicon genomes could also be assembled  
73 by *in-vitro*-ligation of four DNA fragments and the RNA generated by the *in-vitro*-ligated  
74 DNA template was capable of replication as the RNAs derived from the BAC-template. Thus,  
75 we provided a simple SARS-CoV-2 replicon system for antiviral development.

## 76 **Results**

### 77 **Construction of a bacterial artificial chromosome (BAC) based SARS-CoV-2 replicon.**

78 Total RNAs were extracted from SARS-CoV-2 (nCoV-SH01) infected cells<sup>11</sup>, and then  
79 reversely transcribed by superscript IV with random primer. Totally, 20 fragments with  
80 approximate 1.5kb-length encompassing the whole viral genomes were amplified with  
81 specific primers according to the illumina-sequenced viral genome (MT121215), cloned and

82 sequenced. The fragments were then assembled by fusion PCR and subcloning into larger  
83 fragments A (1-8586nt), B (8587-15102nt), C (15103-21562nt) and D and cloned into a  
84 homemade cloning vector pLC-Zero-blunt (Fig.1). Took a similar strategy for construction of  
85 SARS-CoV replicon<sup>12</sup>, we deleted the structural protein genes and retained the N gene and  
86 essential promoter regions. We replaced the S gene region with a reporter gene cassette,  
87 including secreted *Gaussia* luciferase (sGluc), foot-and-mouth disease virus (FMDV) 2A  
88 peptide and blasticidin (BSD), whose expression was driven by the promoter of S gene in the  
89 subgenomic mRNA (Fig. 1). To facilitate cloning, a *Bam*HI site was introduced downstream  
90 the genome position of 21562 (nt) in the pLC-nCoV-C plasmid. T7 promoter was added  
91 before the 5' viral genome in the fragment A for *in vitro* transcription with T7 polymerase. The  
92 3' viral genome was flanked with polyA30, hepatitis delta virus ribozymes (HDVr) and  
93 terminator sequence for T7 polymerase (T7T) (Fig. 1), which facilitates *in-vitro* transcription  
94 without linearization and production of precise polyadenylated viral RNA. The fragments of  
95 A, B, C and D were assembled further into AB and CD in pLC-Zero-blunt and then  
96 sequentially cloned into a modified BAC vector to get the final plasmid  
97 pBAC-sgnCoV-sGluc (Fig. 1).

## 98 **Replication of SARS-CoV-2 replicon in cells**

99 The plasmid pBAC-sgnCoV-sGluc was used directly as template for *in-vitro*  
100 transcription to produce 5'-capped replicon RNA. Replicon RNA was then co-transfected  
101 with N mRNA into various cell lines. RNA replication was monitored by measuring the  
102 secreted *Gaussia* luciferase activity in the supernatants. Enzymatic dead mutants

103 (759-SAA-761) of the RNA dependent RNA polymerase nsp12<sup>13</sup> were introduced and the  
104 mutated replicon served as a non-replication control. As expected, SAA RNA did not  
105 replicate, without increase of luciferase activity in the transfected Huh7, Huh7.5, Vero and  
106 BHK-21 cells. In contrast, transfection of wild type (WT) replicon RNA resulted in obvious  
107 increase of luciferase activity (Fig. 2a, b, c, d), indicating active viral replication. Huh7.5 cell  
108 is a subclone of Huh7 cells with deficiency in RIG-I and MDA-5 signaling<sup>14, 15</sup>. Vero cell is  
109 routinely used for SARS-CoV-2 isolation. Notably, replicon replication was less efficient in  
110 Huh7.5 and Vero cells (Fig. 2b and c) whereas robust in BHK-21 cells (Fig. 2d), suggesting  
111 that cellular environment may regulate SARS-CoV-2 replication. In consistent with previous  
112 studies, co-transfection of N mRNA enhanced viral replication (Fig. 2a, b, c, d), which is  
113 probably due to the suppression of innate immune response<sup>16</sup>. For convenience, we tried to  
114 establish an N-expressed cell line (Fig.2e). Compared with GFP-expressed cells, Huh7 cells  
115 expressing N supported more robust viral replication (Fig. 2f).

#### 116 **Sensitivity of the SARS-CoV-2 replicon to antiviral agents**

117 We tested the sensitivity of SARS-CoV-2 replicon to remdesivir, which has been  
118 demonstrated to inhibit SARS-CoV-2 viral infection<sup>17</sup>. Huh7 cells were first treated with  
119 remdesivir at various concentrations (10 $\mu$ m, 3.7 $\mu$ m, 1 $\mu$ m, 100nm, 10nm) as reported<sup>17</sup>, and  
120 then the cells were co-transfected with replicon RNA (WT or SAA) and N mRNA. The  
121 luciferase activity in the supernatants was measured at various time points after transfection.  
122 We found that at all concentrations, remdesivir effectively inhibited replicon replication to a  
123 similar level as SAA (Fig.3a). We also examined if the remdesivir inhibited established viral

124 RNA replication. We first transfected replicon RNA, and then added remdesivir eight hours  
125 post transfection and monitored viral replication at various time points post treatment. Under  
126 this condition, remdesivir also reduced whereas did not completely block viral replication  
127 (Fig. 3b). Then we tested the sensitivity of SARS-CoV-2 replicon to other antiviral agents.  
128 Huh7 cells were first treated with interferon alpha (IFN- $\alpha$ )(100U/ml), remdesivir (10 nM),  
129 daclatasvir (1  $\mu$ M), sofosbuvir (10  $\mu$ M) and 2'-C-Methylcytidine (2CMC)(50  $\mu$ M) for four  
130 hours, then the cells were co-transfected with replicon RNA (WT or SAA) and N mRNA.  
131 The luciferase activity in the supernatants was measured at the various time points after  
132 transfection. IFN- $\alpha$  and remdesivir have been demonstrated to inhibit SARS-CoV-2 viral  
133 infection<sup>17, 18</sup>. Daclatasvir and sofosbuvir are direct antivirals targeting hepatitis C virus  
134 NS5A<sup>19</sup> and RNA dependent RNA polymerase<sup>20</sup>, respectively. 2'-C-Methylcytidine is a  
135 nucleoside inhibitor of HCV NS5B polymerase<sup>21</sup>. As shown in Figure 3c, IFN- $\alpha$  and  
136 remdesivir effectively inhibited sgnCoV-sGluc replication. Notably, IFN- $\alpha$  started to reduce  
137 the reporter gene expression at early time point (8 hours post transfection), manifested as  
138 lower luciferase activity than the SAA mutant, which suggests that IFN- $\alpha$  may block  
139 translation of the viral subgenomic mRNA. Remdesivir effectively inhibited the luciferase  
140 expression to a similar level of SAA. In contrast, sofosbuvir and 2'-C-Methylcytidine hardly  
141 reduced luciferase expression and daclatasvir had no effect on luciferase expression (Fig. 3c).  
142 These results demonstrate that SARS-CoV-2 replicon is sensitive to antiviral agents against  
143 SARS-CoV-2.

144 **Sensitivity of SARS-CoV-2 replicon to overexpression of Zinc-finger antiviral protein**

145 **(ZAP).**

146 Zinc-finger antiviral protein recognizes CpG dinucleotide on non-self RNA and exerts  
147 antiviral activity<sup>22</sup>. There is extreme low CpG content of SARS-CoV-2 genome, suggesting  
148 SARS-CoV-2 may evolve under the pressure of ZAP<sup>23, 24</sup>. We generated a stable Huh7 cell  
149 line expressing the long isoform of ZAP (ZAPL) and examined the replicon RNA replication  
150 in the Huh7-ZAPL cells (Fig. 4a). There was about 10-fold reduction of replicon replication  
151 in Huh7-ZAPL comparing with that in GFP expressing cells (Huh-GFP) (Fig. 4b), suggesting  
152 replicon replication is sensitive to ZAPL overexpression.

153 **Assembly of SARS-CoV-2 replicon by *in vitro* ligation.**

154 As the difficulties to manipulate with BAC vectors, we tried to assemble the four  
155 fragments A, B, C and D by *in-vitro* ligation. We introduced additional BsaI sites into the 5'  
156 and 3' of each fragment in the assembly plasmids pLC-nCoV-A, pLC-nCoV-B, pLC-nCoV-C,  
157 pnCoV-sGluc, retaining all the original restrictions enzymes. The fragments were released  
158 from the plasmid by BsaI digestion, and assembled by *in-vitro* ligation with T4 ligase (Fig.  
159 5a). RNAs transcribed from the *in-vitro* ligated template replicated similar as the RNAs  
160 transcribed from BAC vector (Fig. 5b).

161 **Discussion**

162 In this study, we described a replicon system of SARS-CoV-2. In the replicon, we  
163 deleted the spike (S), membrane (M), envelop (E) genes that are essential for virion  
164 production, making it non-infectious and safe (Fig. 1). Upon transfection into various cells,  
165 the replicon RNA could replicate, manifested by the expression of subgenomic mRNA



166 encoded sGluc (Fig. 2). The viral replication was inhibited by anti-SARS-CoV-2 antiviral  
167 agent remdesivir and by IFN- $\alpha$  but was not by antivirals against hepatitis C virus (Fig. 3).  
168 This replicon system avoids requirement for specific biosafety facilities. The BAC-vectored  
169 replicon system does not need *in vitro* ligation or recombination in yeast, which simplifies the  
170 experiment processes. Thus this replicon system would be used conveniently to perform  
171 antiviral screening against SARS-CoV-2. We also constructed a four-plasmid *in-vitro* ligation  
172 system that is compatible with the BAC system. Replicon RNAs produced from the *in-vitro*  
173 ligated replicate similarly with the RNAs transcribed from BAC plasmids (Fig. 5). It is easy  
174 to introduce desired mutations into the assembly plasmids for *in-vitro* ligation, which make it  
175 suitable for dissecting the effect of emerging mutations on viral replication and molecular  
176 mechanisms of viral replication.

## 177 **Material and methods**

### 178 **Cloning**

179 Total RNAs were extracted from SARS-CoV-2 (nCoV-SH01) infected cells<sup>11</sup>, reversely  
180 transcribed by superscript IV (Invitrogen) with random primer. Totally 20 fragments with  
181 approximate 1.5kb-length encompassing the whole viral genomes were amplified with  
182 specific primers according to the illumina-sequenced viral genome (MT121215), cloned into  
183 a homemade cloning vector pZero-blunt and sequenced. Four larger fragments A (1-8586nt),  
184 B (8587-15102nt, C (15103-21562nt) and D with deletion of structural protein genes and  
185 addition of reporter gene cassette were assembled by fusion PCR and subcloning, and then  
186 cloned into a homemade cloning vector pLC-Zero-blunt and pcDNA3.1 (invitrogen),

187 respectively, resulted in plasmids pLC-nCoV-A, pLC-nCoV-B, pLC-nCoV-C, and  
188 pCoV-D-sGluc. To facilitate cloning, a *BamHI* site was introduced downstream the genome  
189 position of 21562 (nt) in the plasmid pLC-nCoV-C. In fragment A, T7 promoter was added  
190 before the 5' viral genome. In fragment D, a expression cassette containing secreted *Gaussia*  
191 luciferase (sGluc), foot-and-mouth disease virus (FMDV) 2A peptide (*NFDLL KLAGD*  
192 *VESNP GP*) and blasticidin (BSD) was added upstream the 5'-postion of viral genome. The 3'  
193 viral genome was flanked with polyA30, hepatitis delta virus ribozymes (HDVr) and  
194 terminator sequence for T7 polymerase (T7T). Inactive mutants (759-SAA-761) of the RNA  
195 dependent RNA polymerase nsp12 was introduced into the C fragment at the predicted  
196 catalytic residues (759-SDD-761)<sup>13</sup> by fusion PCR mediated mutagenesis.

197 To assemble the four fragments into bacterial artificial chromosome (BAC) vector, first  
198 we modified the pSMART-BAC v2.0 (Lucigen) to get ride of unwanted restriction enzymes  
199 and added *AatII* and *XhoI* sites to facilitate cloning by multiple rounds of fusion-PCR  
200 mediated mutagenesis. The fragments were then sequentially cloned into the BAC vector. We  
201 first assemble the fragment A and B, C and D by enzyme digestion to get the plasmid  
202 pLC-nCoV-AB and pLC-nCoV-CD, respectively. Then the AB fragments were cloned into  
203 the *SbfI/XhoI* site to generate pBAC-sgnCoV-AB. Then the CD fragments were ligated into  
204 the *SacI/AsiI* site to get pBAC-sgnCoV-sGluc. BAC plasmid was delivered into  
205 BAC-Optimized Replicator v2.0 Electrocompetent Cells (Lucigen) by electroporation and  
206 bacteria was propagated according to the manufacturer's guide. Colonies were picked and  
207 cultured in LB medium containing 12.5 µg/ml chloramphenicol. L-arabinose was added to

208 cultures when the OD<sub>600</sub> reaches 0.2-0.3 to increase the plasmid copy numbers.

209 For assembly of SARS-CoV-2 replicon by *in-vitro*-ligation, we first got rid of the BsaI  
210 site on fragment C by fusion-PCR mediated synonymous mutagenesis. The BsaI sites were  
211 added into the 5' and 3' of the fragment A, B, C and D in the plasmids of pLC-nCoV-A,  
212 pLC-nCoV-B, pLC-nCoV-C, and pnCoV-D-sGluc by fusion PCR-mediated cloning, resulted  
213 in the plasmids pLC-nCoV-A-BsaI, pLC-nCoV-B-BsaI, pLC-nCoV-C-BsaI, and  
214 pnCoV-D-sGluc-BsaI. The plasmids retained all the original enzymatic sites, for convenience  
215 to swap into the BAC vector if desired. The fragments were released from the plasmids by  
216 *BsaI* digestion, after gel purification and ligated by T4 ligase.

217 To construct lentiviral vector expression plasmids, sequences encoding the GFP,  
218 SARS-CoV-2 nucleocapsid protein (N) were cloned into the XbaI/BsrGI site of  
219 pTRIP-IRES-BSD. Sequence encoding the long isoform of Zinc-finger antiviral protein  
220 (ZAPL) were synthesized by Wuxi Qinglan Biotech (Wuxi, China) and cloned into the  
221 XbaI/BamHI site of pTRIP-IRES-BSD. An HA tag was added into the N-terminal of ZAP.  
222 For production of N mRNA, sequence encoding N was first cloned into the KpnI/BamHI  
223 sites of pCMV to get the plasmid pCMV-N. All the plasmids were verified by Sanger  
224 sequencing. The detail information was available upon request.

## 225 **Cell lines**

226 The human hepatoma cells Huh 7, baby hamster kidney cells BKH-21, Vero E6 cells were  
227 purchased from the Cell Bank of the Chinese Academy of Sciences ([www.cellbank.org.cn](http://www.cellbank.org.cn))  
228 and routinely maintained in Dulbecco's modified medium supplemented with 10 % FBS

229 (Gibco) and 25 mM HEPES (Gibco). Huh 7.5 (Kindly provided by C. Rice) cells were  
230 routinely maintained in a similar medium supplemented with non-essential amino acids  
231 (Gibco). Huh7-GFP, Huh7-N, Huh7-ZAPL cell line was routinely maintained in the medium  
232 supplemented with 0.5 µg/ml blasticidin.

### 233 **Lentivirus pseudoparticle**

234 VSV-G-pseudotyped lentiviral particles were prepared by co-transfection of VSV-G, HIV  
235 gag-pol and lentiviral provirus plasmids into HEK293T cells. The medium overlying the cells  
236 was harvested at 48 h after transfection, filtered through a 0.45-µm filter, and stored at -80°C.  
237 Cells were transduced with the pseudoparticles in the presence of 8 µg/ml Polybrene.

### 238 **Inhibitors**

239 Remdesivir (GS-5734), Daclatasvir (S1482), Sofosbuvir (GS-7977) were purchased from  
240 Selleckchem, 2'-C-Methylcytidine (HY-10468) was purchased from MedChem Express,  
241 IFN-α (11200-2) was purchased from PBL.

### 242 **Antibodies**

243 Anti-β-actin antibody (Sigma; A1978) was used at 1:5000 dilution; Anti-HA antibody (CST;  
244 37243) was used at 1:000 dilution; Anti-GFP antibody (Santa Cruz;sc-9996) was used at  
245 1:1000 dilution; Anti-ZAPL antibody (Proteintech; 16820-1-AP) was used at 1:1000 dilution;  
246 Anti-N antibody(GeneTex; GTX632269) was used at 1:500 dilution; Goat-anti-mouse IRDye  
247 800CW secondary antibody (licor; 926-32210) was used at 1:10,000 dilution.  
248 Goat-anti-rabbit IRDye 800CW secondary antibody (licor; 926-32211) was used at 1:10,000  
249 dilution in western blotting.

250 **Western blotting**

251 After washing with PBS, cells were lysed with 2 × SDS loading buffer (100 mM Tris-Cl [pH  
252 6.8], 4% SDS, 0.2% bromophenol blue, 20% glycerol, 10% 2-mercaptoethanol) and then  
253 boiled for 5 min. Proteins were separated by SDS-PAGE and transferred to a nitrocellulose  
254 membrane. The membranes were incubated with blocking buffer (PBS, 5% milk, 0.05%  
255 Tween) for 1 h and then with primary antibody diluted in the blocking buffer. After three  
256 washes with PBST (PBS, 0.05% Tween), the membranes were incubated with secondary  
257 antibody. After three washes with PBST, the membrane was visualized by Western Lightning  
258 Plus-ECL substrate (PerkinElmer, NEL10500) or by Odyssey CLx Imaging System.

259 ***In-vitro* ligation**

260 BsaI digested fragment were gel purified by using Gel Extraction Kit (OMEGA) and ligated  
261 with T4 ligase (New England Biolabs) at room temperature for 1h. The ligation products  
262 were phenol/chloroform extracted, precipitated by absolute ethanol, and resuspended in  
263 nuclease-free water, quantified by determining the A260 absorbance.

264 ***In-vitro* transcription**

265 BAC-based sgnCoV-sGluc plasmids or purified *in-vitro* ligated products were used as  
266 templates for the *in-vitro* transcription by mMACHINE T7 Transcription Kit  
267 (Ambion) according to the manufacturer's protocol. For N mRNA production, we amplified  
268 the N coding region by PCR (sense: *GGC ACA CCC CTT TGG CTC T*; antisense: *TTT TTT*  
269 *TTT TTT TTT TTT TTT TTT TTT TTT TTT TTT TCT AGG CCT GAG TTG AGT CAG*  
270 *CAC*) with phCMV-N as template. Then the purified PCR product was used as template for

271 *in-vitro* transcription by mMMESSAGE mMACHINE T7 Transcription Kit as described above.  
272 RNA was purified by RNeasy mini Elute (Qiagen) and eluted in nuclease-free water,  
273 quantified by determining the A260 absorbance.

#### 274 **Transfection**

275 Cells were seeding onto 48-well plates at a density of  $7.5 \times 10^4$  per well and then transfected  
276 with 0.3  $\mu\text{g}$  *in-vitro*-transcribed RNA using a TransIT-mRNA transfection kit (Mirus)  
277 according to the manufacturer's protocol.

#### 278 **Luciferase activity**

279 Supernatants were taken from cell medium and mixed with equal volume of 2  $\times$  lysis buffer  
280 (Promega). Luciferase activity was measured with Renilla luciferase substrate (Promega)  
281 according to the manufacturer's protocol.

#### 282 **Acknowledgements**

283 This work was supported in part by the National Science and Technology Major Project of  
284 China (2017ZX10103009), Key Emergency Project of Shanghai Science and Technology  
285 Committee (20411950103). The funders had no role in study design, data collection and  
286 analysis, decision to publish, or preparation of the manuscript.

#### 287 **Author Contributions**

288 Conceived the study: Z Yi; conducted the study: Y Zhang, W Song, S Chen, Z Yi; Data  
289 analysis: Z Yi, Y Zhang; Manuscript draft: Y Zhang, Z Yi; Resources: Z Yuan, Z Yi

#### 290 **Conflict of Interest**

291 The authors declare no conflict of interest.

292 **References:**

- 293 1. Zhu, N. *et al.* A Novel Coronavirus from Patients with Pneumonia in China, 2019. *N*  
294 *Engl J Med* **382**, 727-733 (2020).
- 295 2. Zhou, P. *et al.* A pneumonia outbreak associated with a new coronavirus of probable  
296 bat origin. *Nature* **579**, 270-273 (2020).
- 297 3. Chen, L. *et al.* RNA based mNGS approach identifies a novel human coronavirus  
298 from two individual pneumonia cases in 2019 Wuhan outbreak. *Emerg Microbes*  
299 *Infect* **9**, 313-319 (2020).
- 300 4. Zhu, F.C. *et al.* Safety, tolerability, and immunogenicity of a recombinant adenovirus  
301 type-5 vectored COVID-19 vaccine: a dose-escalation, open-label, non-randomised,  
302 first-in-human trial. *Lancet* **395**, 1845-1854 (2020).
- 303 5. Wang, Y. *et al.* Remdesivir in adults with severe COVID-19: a randomised,  
304 double-blind, placebo-controlled, multicentre trial. *Lancet* **395**, 1569-1578 (2020).
- 305 6. Bonovas, S. & Piovani, D. Compassionate Use of Remdesivir in Covid-19. *N Engl J*  
306 *Med* **382**, e101 (2020).
- 307 7. Wong, Y.K., Yang, J. & He, Y. Caution and clarity required in the use of chloroquine  
308 for COVID-19. *Lancet Rheumatol* **2**, e255 (2020).
- 309 8. Xie, X. *et al.* An Infectious cDNA Clone of SARS-CoV-2. *Cell Host Microbe* **27**,  
310 841-848 e843 (2020).
- 311 9. Thao, T.T.N. *et al.* Rapid reconstruction of SARS-CoV-2 using a synthetic genomics  
312 platform. *Nature* **582**, 561-565 (2020).

- 313 10. Masters, P.S. & Perlman, S. Coronaviridae. *Fields Virology*, 825-858 (sixth edition).
- 314 11. Zhang, R. *et al.* Isolation of a 2019 novel coronavirus strain from a coronavirus  
315 disease 19 patient in Shanghai. *Journal of Microbes and Infection* **15**, 15-20 (2020).
- 316 12. Ge, F., Luo, Y., Liew, P.X. & Hung, E. Derivation of a novel SARS-coronavirus  
317 replicon cell line and its application for anti-SARS drug screening. *Virology* **360**,  
318 150-158 (2007).
- 319 13. Gao, Y. *et al.* Structure of the RNA-dependent RNA polymerase from COVID-19  
320 virus. *Science* **368**, 779-782 (2020).
- 321 14. Du, X.T. *et al.* Hepatitis C virus replicative double-stranded RNA is a potent  
322 interferon inducer that triggers interferon production through MDA5. *J Gen Virol* **97**,  
323 2868-2882 (2016).
- 324 15. Stumper, R. *et al.* Regulating intracellular antiviral defense and permissiveness to  
325 hepatitis C virus RNA replication through a cellular RNA helicase, RIG-I. *J Virol* **79**,  
326 2689-2699 (2005).
- 327 16. Ye, Y., Hauns, K., Langland, J.O., Jacobs, B.L. & Hogue, B.G. Mouse hepatitis  
328 coronavirus A59 nucleocapsid protein is a type I interferon antagonist. *J Virol* **81**,  
329 2554-2563 (2007).
- 330 17. Wang, M. *et al.* Remdesivir and chloroquine effectively inhibit the recently emerged  
331 novel coronavirus (2019-nCoV) in vitro. *Cell research* **30**, 269-271 (2020).
- 332 18. Li, L. *et al.* Antiviral Agent Therapy Optimization in Special Populations of  
333 COVID-19 Patients. *Drug design, development and therapy* **14**, 3001-3013 (2020).



- 334 19. Gao, M. *et al.* Chemical genetics strategy identifies an HCV NS5A inhibitor with a  
335 potent clinical effect. *Nature* **465**, 96-100 (2010).
- 336 20. Kohli, A., Shaffer, A., Sherman, A. & Kottlil, S. Treatment of hepatitis C: a  
337 systematic review. *Jama* **312**, 631-640 (2014).
- 338 21. Mathy, J.E., Ma, S., Compton, T. & Lin, K. Combinations of cyclophilin inhibitor  
339 NIM811 with hepatitis C Virus NS3-4A Protease or NS5B polymerase inhibitors  
340 enhance antiviral activity and suppress the emergence of resistance. *Antimicrobial*  
341 *agents and chemotherapy* **52**, 3267-3275 (2008).
- 342 22. Takata, M.A. *et al.* CG dinucleotide suppression enables antiviral defence targeting  
343 non-self RNA. *Nature* **550**, 124-127 (2017).
- 344 23. Zhang, J. *et al.* Multi-site co-mutations and 5'UTR CpG immunity escape drive the  
345 evolution of SARS-CoV-2. *bioRxiv*, 2020.2007.2021.213405 (2020).
- 346 24. Xia, X. Extreme Genomic CpG Deficiency in SARS-CoV-2 and Evasion of Host  
347 Antiviral Defense. *Molecular biology and evolution* **37**, 2699-2705 (2020).
- 348
- 349

## 350 **Figure Legends**

351 **Fig. 1. Schematic of construction of BAC-based replicon of SARS-CoV-2.** Twenty  
352 fragments encompassing the whole viral genomes were amplified, cloned and sequenced.  
353 Four larger fragments A (1-8586nt), B (8587-15102nt), C (15103-21562nt) and D with  
354 deletion of structural protein genes and addition of reporter gene cassette were assembled and  
355 cloned. To facilitate cloning, a BamHI site (**in bold**) was introduced downstream the genome  
356 position of 21562 (nt). In fragment A, T7 promoter (T7P) was added. In fragment D, an  
357 expression cassette containing secreted *Gaussia* luciferase (sGluc), foot-and-mouth disease  
358 virus (FMDV) 2A peptide and blasticidin (BSD) was added. The 3' viral genome was flanked  
359 with polyA30, hepatitis delta virus ribozymes (HDVr) and terminator sequence for T7  
360 polymerase (T7T). Then the fragments were assembled and sequentially cloned into a  
361 modified BAC plasmid. Upon transfected into cells, the replicon RNA can be used as  
362 template for RNA replication or transcription to produce subgenomic RNA. The sGluc  
363 subgenomic RNA is translated to produce sGluc.

364 **Fig. 2. Replication of sgnCoV-sGluc in different cells.** a-d Huh7, Huh7.5, Vero and  
365 BHK-21 cells were transfected with *in-vitro*-transcribed replicon RNA(WT) or the nsp12  
366 polymerase active-site mutant (SAA). An mRNA encoding the SARS-CoV-2 N protein was  
367 co-transfected or not. The luciferase activity in the supernatants was measured at the time  
368 points indicated. Medium was changed at each time point. Data are shown as mean±SD (n=3).  
369 e-f Replication of replicon RNA in Huh7 cells overexpressed N protein. e Huh7 cells  
370 overexpressed GFP protein or N protein were analyzed by Western blotting with the

371 indicated antibodies. **f** Huh7-GFP and Huh7-N cells were transfected with replicon RNA  
372 (WT or SAA). The luciferase activity in the supernatants was measured at the time points  
373 indicated. Medium was changed at 8 hours post transfection. Data are shown as mean±SD  
374 (n=3).

375 **Fig. 3. Sensitivity of the SARS-CoV-2 replicon to antiviral agents.** **a** Huh7 cells were  
376 treated with remdesivir as the indicated concentration. Four hours later, cells were  
377 co-transfected with replicon RNA (WT or SAA) and N mRNA. The luciferase activity in the  
378 supernatants was measured at the time points indicated. **b** Huh7 cells were co-transfected  
379 with replicon RNA (WT or SAA) and N mRNA. Eight hours later, medium was changed  
380 with remdesivir as the indicated concentration. The luciferase activity in the supernatants was  
381 measured at the time points indicated. **c** Huh7 cells were treated with remdesivir (10nM),  
382 IFN- $\alpha$ (100 U/ml), daclatasvir(1  $\mu$ M), sofosbuvir(10  $\mu$ M), 2CMC(50  $\mu$ M). Four hours later,  
383 cells were co-transfected with replicon RNA (WT or SAA) and N mRNA. The luciferase  
384 activity in the supernatants was measured at the time points indicated. Medium was changed  
385 at 8 hours post transfection. Data are shown as mean±SD (n=3).

386 **Fig. 4. Sensitivity of SARS-CoV-2 replicon to overexpression of Zinc-finger**  
387 **antiviral protein (ZAP).** **a** Huh7 cells overexpressed ZAPL protein or GFP protein were  
388 analyzed by Western blotting with the indicated antibodies. **b** Huh7-GFP and Huh7-ZAPL  
389 cells were co-transfected with replicon RNA (WT or SAA) and N mRNA. The luciferase  
390 activity in the supernatants was measured at the time points indicated. Medium was changed  
391 at 8 hours post transfection. Data are shown as mean±SD (n=3).

392           **Fig. 5. Assembly of SARS-CoV-2 replicon by *in vitro* ligation.** **a** Schematic of the  
393 *in-vitro* ligation system for SARS-CoV-2 replicon. **b** Huh7 cells were co-transfected with  
394 replicon RNA (WT or SAA) and N mRNA generated by BAC-based system or *in-vitro*  
395 ligation system. The luciferase activity in the supernatants was measured at the time points  
396 indicated. Medium was changed at 8 hours post transfection. Data are shown as mean±SD  
397 (n=3).

398

399

400

401 **Figure 1**

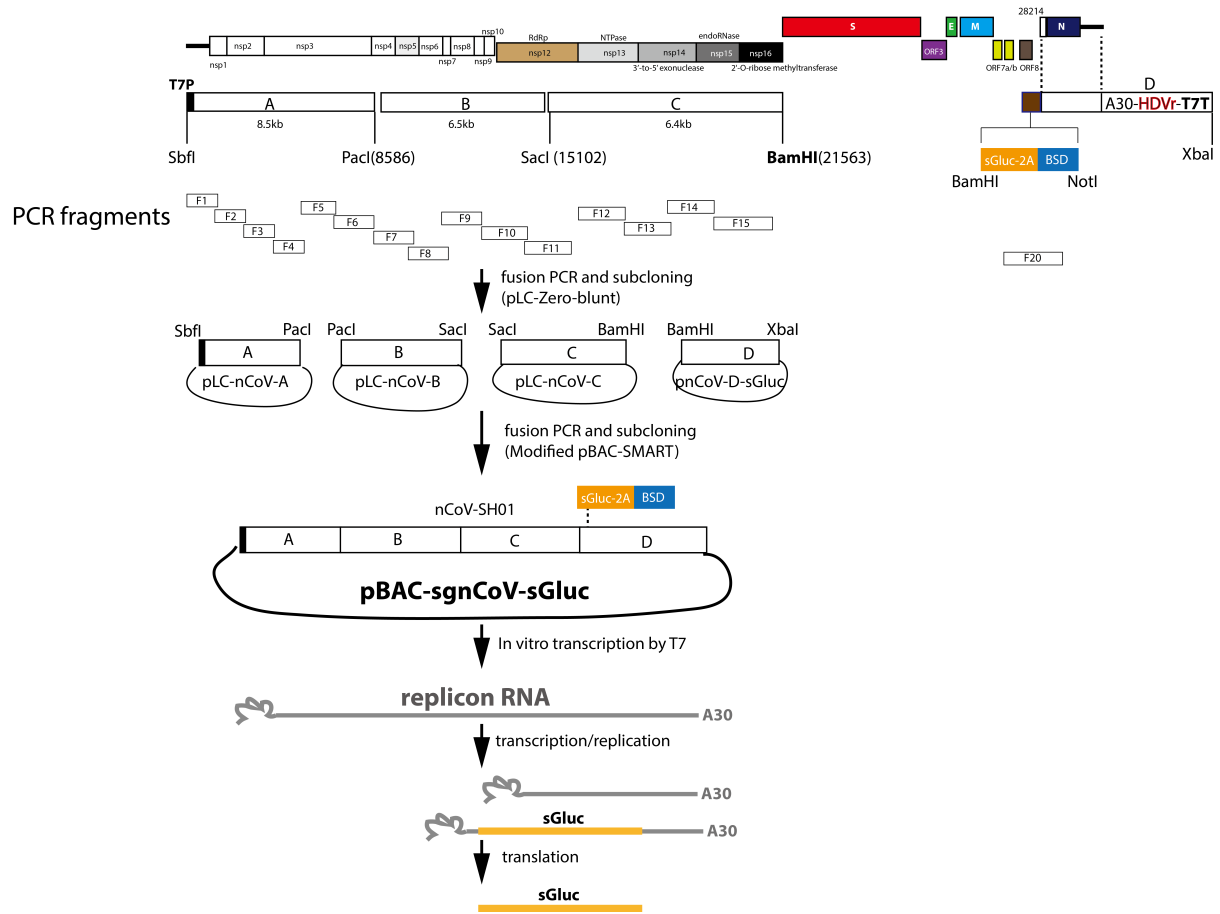

402

403

404 **Figure 2**

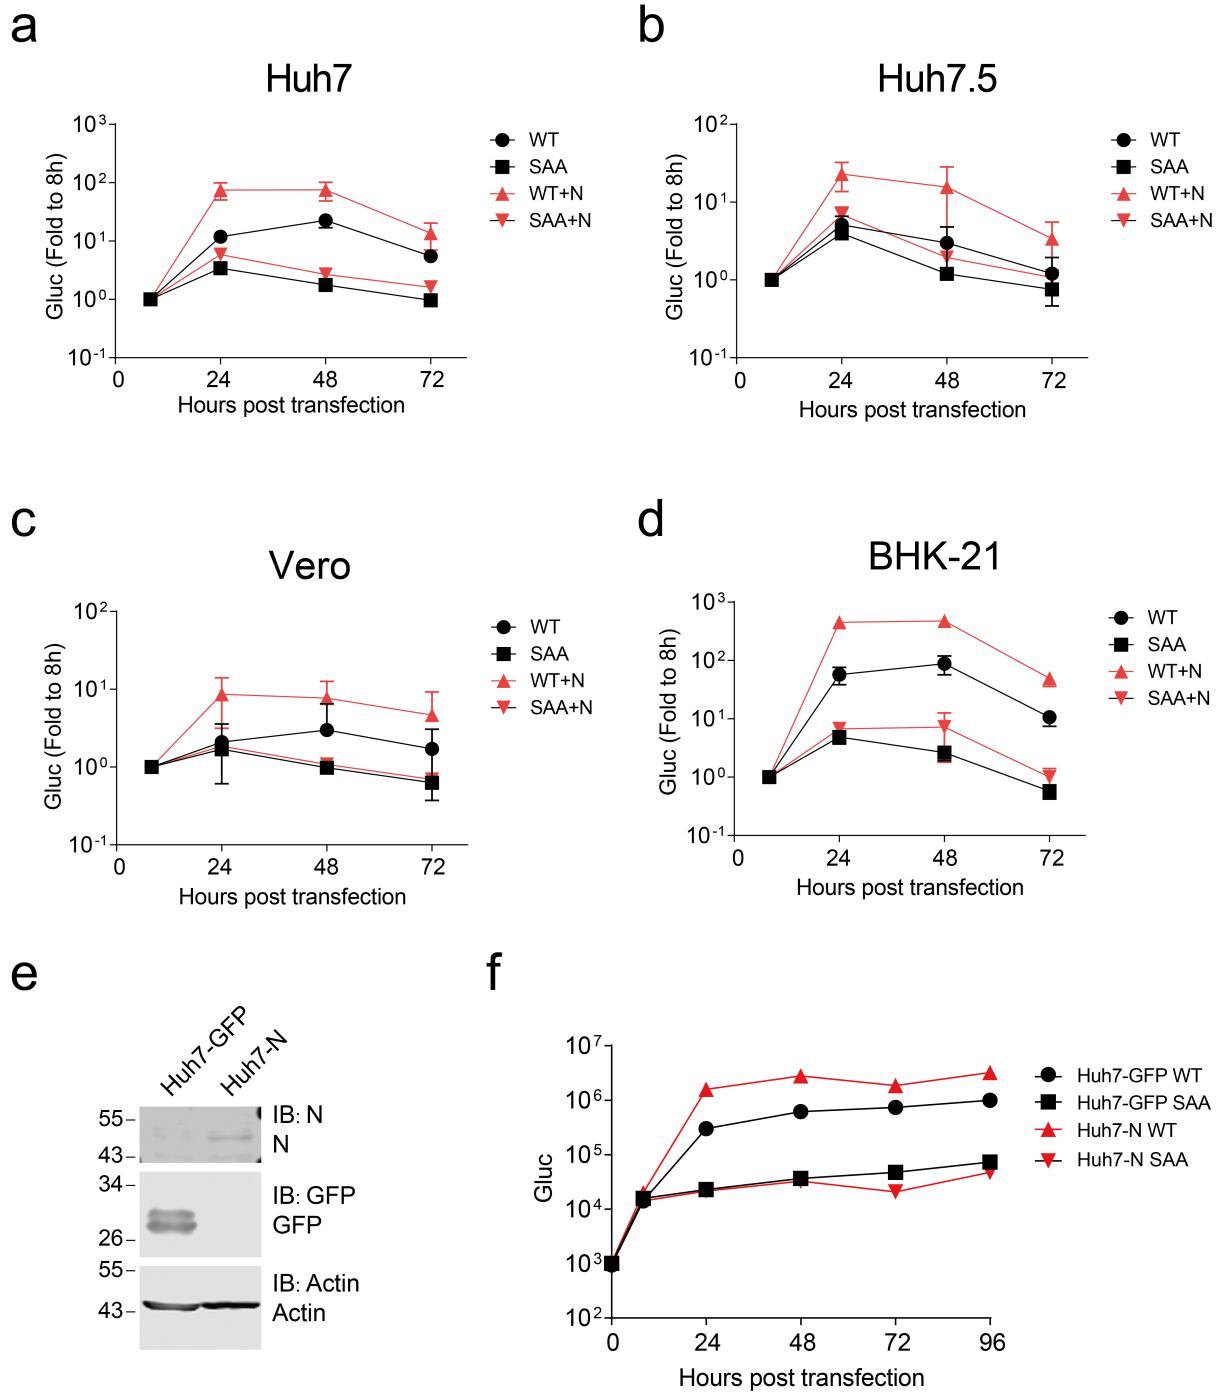

405

406

407 **Figure 3**

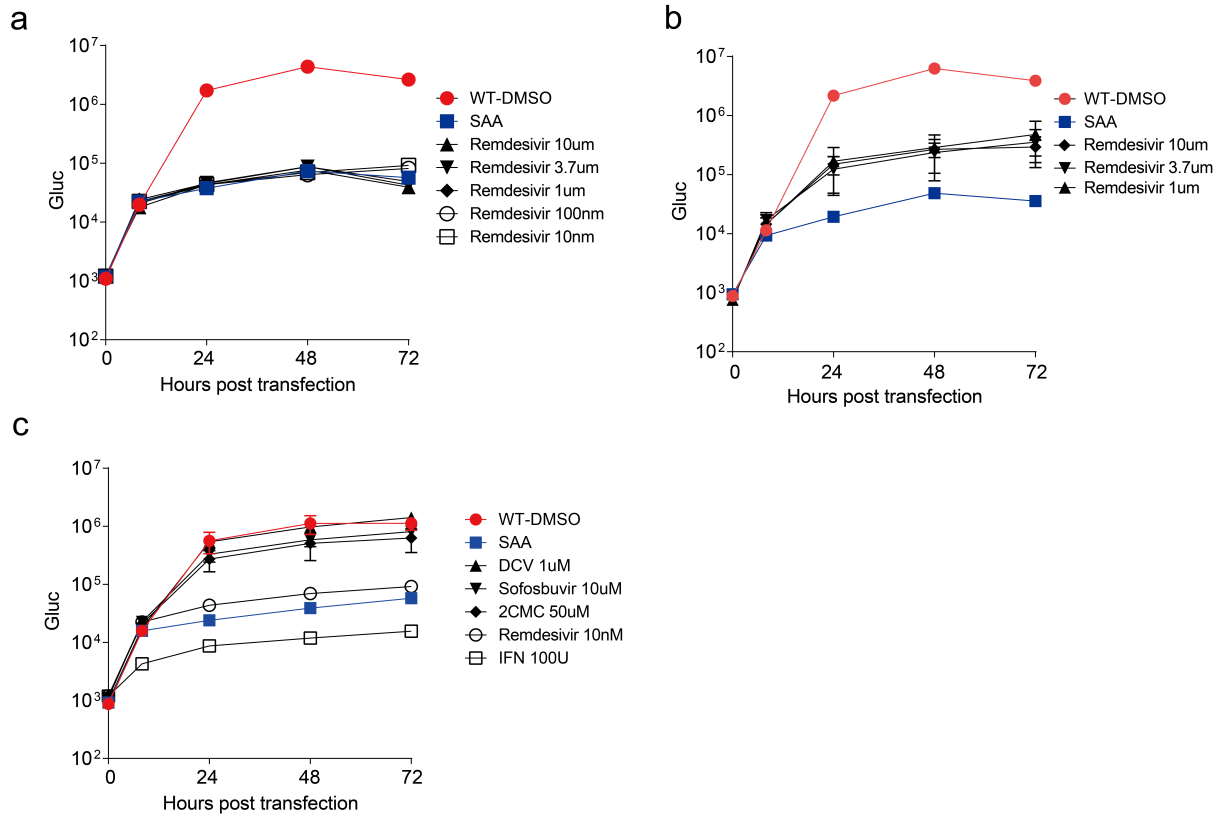

408

409

410 **Figure 4**

**a**

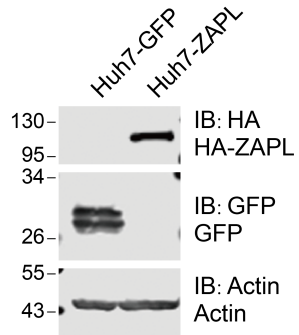

**b**

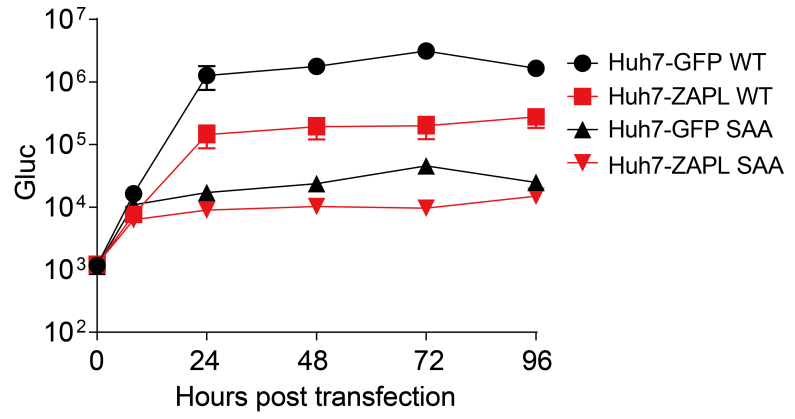

411

412



413 **Figure 5**

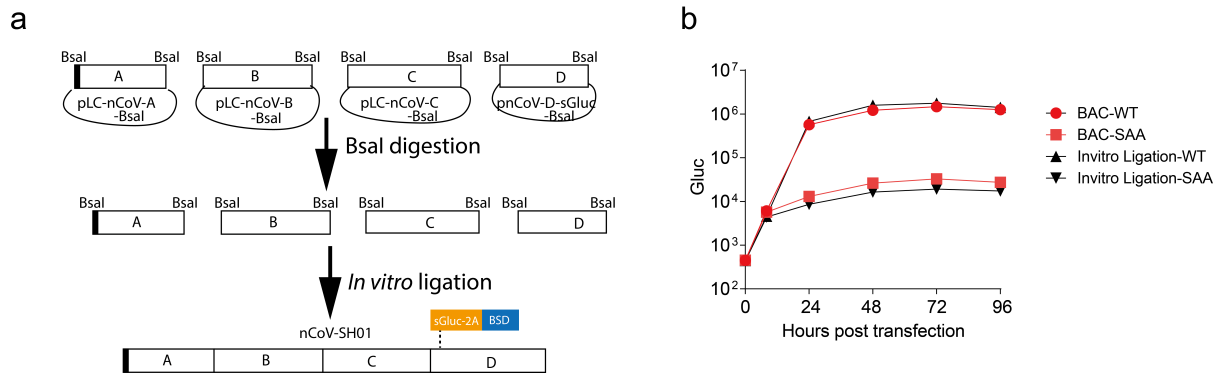

414

415

416
